# Supplementary material
Source: PubMed Central journal article supplement (PMC4640283)

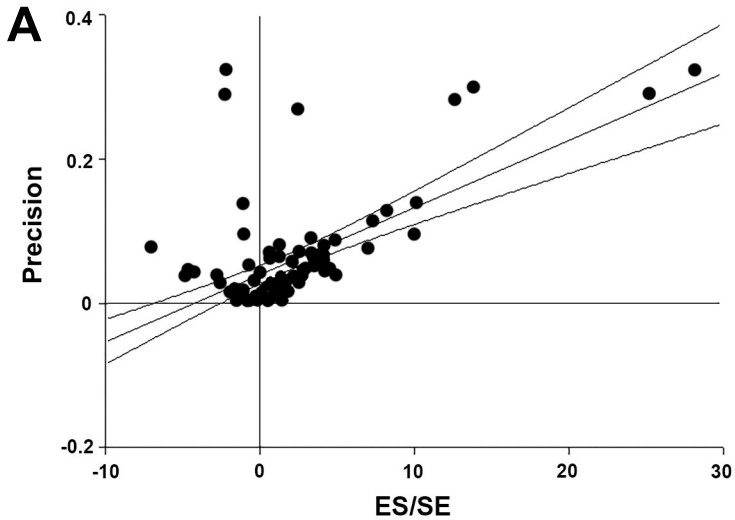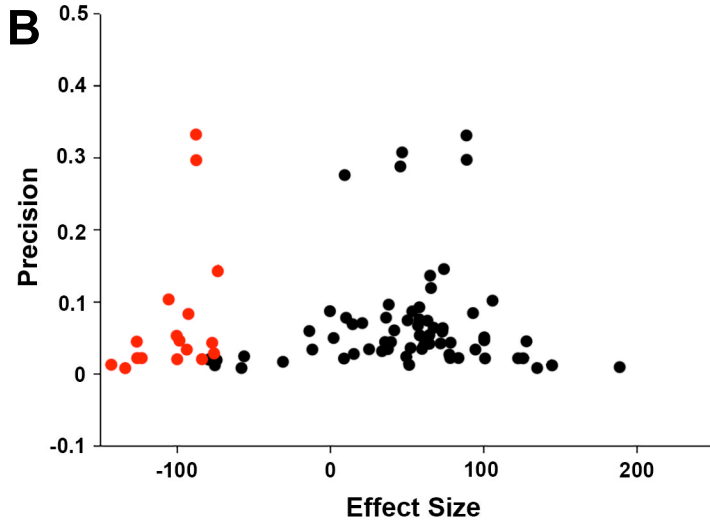

Supplement: jcbfm201589x1.pdf [file jcbfm201589x1.pdf]
